# Supplementary material for: Prevalence of Chronic Diseases and Alterations of Gut Microbiome in Ningxia China During Urbanization: An Epidemiological Survey
Source: Research Square preprint supplement (doi:10.21203/rs.3.rs-119481/v1), 2020-12-08
Supplement: Supplementary file 4 [file 6a3922bd3e80b654583e7bc9.xlsx]

## Sheet: Table S10
Table S10 LEFse analysis and KEGG assignments of the MR, MU, PR and PU groups
	group	LDA_value	P_value
L1_Genetic_Information_Processing	MR	3.65786	1.52911e-20
L1_Genetic_Information_Processing.L2_Replication_and_Repair	MR	3.3754	7.36118e-18
L1_Genetic_Information_Processing.L2_Translation	MR	3.31591	4.86986e-23
L1_Cellular_Processes	MR	3.15438	1.11633e-09
L1_Cellular_Processes.L2_Cell_Motility	MR	3.14411	3.13159e-08
L1_Genetic_Information_Processing.L2_Translation.L3_Ribosome	MR	2.9994	7.52173e-21
L1_Metabolism.L2_Nucleotide_Metabolism	MR	2.8617	1.46883e-06
L1_Genetic_Information_Processing.L2_Replication_and_Repair.L3_DNA_repair_and_recombination_proteins	MR	2.81719	1.06333e-15
L1_Cellular_Processes.L2_Cell_Motility.L3_Bacterial_motility_proteins	MR	2.79292	1.30083e-06
L1_Genetic_Information_Processing.L2_Translation.L3_Aminoacyl_tRNA_biosynthesis	MR	2.74222	4.46336e-26
L1_Unclassified.L2_Cellular_Processes_and_Signaling.L3_Sporulation	MR	2.67445	2.42397e-05
L1_Metabolism.L2_Nucleotide_Metabolism.L3_Pyrimidine_metabolism	MR	2.67345	2.20798e-10
L1_Unclassified.L2_Genetic_Information_Processing	MR	2.64151	3.21285e-11
L1_Metabolism.L2_Enzyme_Families.L3_Peptidases	MR	2.62076	2.15293e-05
L1_Metabolism.L2_Amino_Acid_Metabolism.L3_Amino_acid_related_enzymes	MR	2.61137	1.14881e-24
L1_Genetic_Information_Processing.L2_Replication_and_Repair.L3_Chromosome	MR	2.61067	7.82766e-16
L1_Genetic_Information_Processing.L2_Translation.L3_Ribosome_Biogenesis	MR	2.55762	1.48713e-19
L1_Genetic_Information_Processing.L2_Replication_and_Repair.L3_DNA_replication_proteins	MR	2.5303	2.43634e-12
L1_Cellular_Processes.L2_Cell_Motility.L3_Flagellar_assembly	MR	2.50685	7.74111e-06
L1_Cellular_Processes.L2_Cell_Motility.L3_Bacterial_chemotaxis	MR	2.50395	2.51776e-06
L1_Genetic_Information_Processing.L2_Replication_and_Repair.L3_Homologous_recombination	MR	2.49898	2.19741e-16
L1_Metabolism.L2_Glycan_Biosynthesis_and_Metabolism.L3_Peptidoglycan_biosynthesis	MR	2.47402	5.03392e-19
L1_Metabolism.L2_Enzyme_Families	MR	2.46661	0.00412698
L1_Genetic_Information_Processing.L2_Replication_and_Repair.L3_Mismatch_repair	MR	2.44164	2.86822e-18
L1_Unclassified.L2_Genetic_Information_Processing.L3_Replication__recombination_and_repair_proteins	MR	2.41991	4.19117e-12
L1_Unclassified.L2_Genetic_Information_Processing.L3_Translation_proteins	MR	2.40738	2.27398e-23
L1_Cellular_Processes.L2_Cell_Motility.L3_Cytoskeleton_proteins	MR	2.38868	3.00157e-15
L1_Metabolism.L2_Metabolism_of_Cofactors_and_Vitamins.L3_One_carbon_pool_by_folate	MR	2.36101	4.20642e-12
L1_Metabolism.L2_Metabolism_of_Terpenoids_and_Polyketides.L3_Terpenoid_backbone_biosynthesis	MR	2.32142	1.08229e-18
L1_Genetic_Information_Processing.L2_Replication_and_Repair.L3_DNA_replication	MR	2.29517	3.94469e-13
L1_Genetic_Information_Processing.L2_Replication_and_Repair.L3_Nucleotide_excision_repair	MR	2.28641	3.73463e-30
L1_Cellular_Processes.L2_Cell_Growth_and_Death	MR	2.26996	3.12797e-10
L1_Genetic_Information_Processing.L2_Translation.L3_Translation_factors	MR	2.25066	3.40561e-16
L1_Metabolism.L2_Amino_Acid_Metabolism.L3_Phenylalanine__tyrosine_and_tryptophan_biosynthesis	MR	2.2179	1.64452e-09
L1_Cellular_Processes.L2_Cell_Growth_and_Death.L3_Cell_cycle___Caulobacter	MR	2.20413	1.1837e-09
L1_Metabolism.L2_Metabolism_of_Terpenoids_and_Polyketides	MR	2.19913	0.00392864
L1_Organismal_Systems.L2_Environmental_Adaptation.L3_Plant_pathogen_interaction	MR	2.17621	1.57504e-11
L1_Metabolism.L2_Energy_Metabolism.L3_Photosynthesis	MR	2.16447	7.59657e-07
L1_Metabolism.L2_Amino_Acid_Metabolism.L3_Cysteine_and_methionine_metabolism	MR	2.1637	2.25961e-13
L1_Organismal_Systems.L2_Environmental_Adaptation	MR	2.14922	1.45812e-13
L1_Metabolism.L2_Metabolism_of_Cofactors_and_Vitamins.L3_Thiamine_metabolism	MR	2.13442	2.84452e-17
L1_Metabolism.L2_Metabolism_of_Cofactors_and_Vitamins.L3_Pantothenate_and_CoA_biosynthesis	MR	2.1249	3.59049e-17
L1_Environmental_Information_Processing.L2_Signaling_Molecules_and_Interaction.L3_G_protein_coupled_receptors	MR	2.11499	1.28265e-15
L1_Metabolism.L2_Energy_Metabolism.L3_Photosynthesis_proteins	MR	2.11274	3.88557e-06
L1_Human_Diseases.L2_Immune_System_Diseases.L3_Systemic_lupus_erythematosus	MU	2.29829	5.30806e-08
L1_Metabolism.L2_Biosynthesis_of_Other_Secondary_Metabolites	MU	2.17579	0.0327634
L1_Cellular_Processes.L2_Transport_and_Catabolism	MU	2.16018	0.0144683
L1_Metabolism.L2_Lipid_Metabolism.L3_Fatty_acid_elongation_in_mitochondria	MU	2.14867	2.01664e-08
L1_Metabolism.L2_Amino_Acid_Metabolism.L3_Arginine_and_proline_metabolism	MU	2.10513	0.000593263
L1_Metabolism.L2_Lipid_Metabolism.L3_Sphingolipid_metabolism	MU	2.09331	0.0176128
L1_Metabolism.L2_Biosynthesis_of_Other_Secondary_Metabolites.L3_Phenylpropanoid_biosynthesis	MU	2.01819	0.00487073
L1_Unclassified	PR	3.15307	8.44859e-09
L1_Unclassified.L2_Cellular_Processes_and_Signaling	PR	2.98398	5.22686e-18
L1_Unclassified.L2_Cellular_Processes_and_Signaling.L3_Other_ion_coupled_transporters	PR	2.6878	1.6398e-15
L1_Unclassified.L2_Metabolism	PR	2.68004	1.40803e-10
L1_Unclassified.L2_Poorly_Characterized.L3_Function_unknown	PR	2.66302	2.49299e-08
L1_Unclassified.L2_Poorly_Characterized	PR	2.56657	4.26044e-07
L1_Unclassified.L2_Cellular_Processes_and_Signaling.L3_Pores_ion_channels	PR	2.4832	2.42175e-10
L1_Metabolism.L2_Glycan_Biosynthesis_and_Metabolism.L3_Lipopolysaccharide_biosynthesis_proteins	PR	2.46228	1.95061e-05
L1_Metabolism.L2_Enzyme_Families.L3_Protein_kinases	PR	2.42858	6.023e-08
L1_Unclassified.L2_Cellular_Processes_and_Signaling.L3_Inorganic_ion_transport_and_metabolism	PR	2.29214	1.9127e-14
L1_Metabolism.L2_Glycan_Biosynthesis_and_Metabolism.L3_Other_glycan_degradation	PR	2.29204	0.00475129
L1_Metabolism.L2_Energy_Metabolism.L3_Nitrogen_metabolism	PR	2.24953	3.31559e-13
L1_Human_Diseases.L2_Infectious_Diseases.L3_Pertussis	PR	2.16482	1.83775e-23
L1_Unclassified.L2_Metabolism.L3_Amino_acid_metabolism	PR	2.01806	2.10738e-11
L1_Metabolism.L2_Carbohydrate_Metabolism	PU	3.19783	1.57939e-09
L1_Environmental_Information_Processing.L2_Membrane_Transport.L3_Phosphotransferase_system__PTS_	PU	2.82375	4.55748e-17
L1_Metabolism.L2_Carbohydrate_Metabolism.L3_Fructose_and_mannose_metabolism	PU	2.53248	2.10061e-17
L1_Metabolism.L2_Metabolism_of_Cofactors_and_Vitamins.L3_Porphyrin_and_chlorophyll_metabolism	PU	2.37925	0.000636405
L1_Metabolism.L2_Lipid_Metabolism	PU	2.36657	0.0124692
L1_Metabolism.L2_Carbohydrate_Metabolism.L3_Pentose_and_glucuronate_interconversions	PU	2.35859	5.52365e-07
L1_Metabolism.L2_Carbohydrate_Metabolism.L3_Ascorbate_and_aldarate_metabolism	PU	2.30697	2.13995e-27
L1_Metabolism.L2_Carbohydrate_Metabolism.L3_Galactose_metabolism	PU	2.23697	0.000341526
L1_Metabolism.L2_Carbohydrate_Metabolism.L3_Amino_sugar_and_nucleotide_sugar_metabolism	PU	2.22532	0.00553516
L1_Unclassified.L2_Metabolism.L3_Others	PU	2.2168	1.72212e-06
L1_Metabolism.L2_Carbohydrate_Metabolism.L3_Glyoxylate_and_dicarboxylate_metabolism	PU	2.21672	3.134e-12
L1_Metabolism.L2_Carbohydrate_Metabolism.L3_Pentose_phosphate_pathway	PU	2.13566	0.000201385
L1_Metabolism.L2_Carbohydrate_Metabolism.L3_Propanoate_metabolism	PU	2.10723	0.000112662
L1_Metabolism.L2_Lipid_Metabolism.L3_Fatty_acid_metabolism	PU	2.08876	0.0152654
L1_Organismal_Systems.L2_Endocrine_System.L3_Renin_angiotensin_system	PU	2.05631	1.83021e-07
L1_Human_Diseases.L2_Neurodegenerative_Diseases	PU	2.04326	1.60706e-14
L1_Metabolism.L2_Carbohydrate_Metabolism.L3_Inositol_phosphate_metabolism	PU	2.01432	1.77593e-20
